# Supplementary material
Source: PubMed Central journal article supplement (PMC1602038)
Supplement: bmj_333_7572_765__1.pdf [file bmj_333_7572_765__1.pdf]

### **Extra references**

- w1. Reiner BI, Siegel EL. Technologists' productivity when using PACS: comparison of film-based versus filmless radiography. *Am J Roentgenol* 2002;179:33-7.
- w2. Strotzer M, Volk M, Frund R, Hamer O, Zorger N, Feuerbach S. Routine chest radiography using a flat-panel detector: image quality at standard detector dose and 33% dose reduction. *Am J Roentgenol* 2002;178:169-71.
- w3. Busch HP. Management of dose and quality in digital radiography. *Rofa* 2003;175:17-9.
- w4. Hennigs SP, Garmer M, Jaeger HJ, Classen R, Jacobs A, Gissler HM, et al. Digital chest radiography with a large-area flat-panel silicon x-ray detector: clinical comparison with conventional radiography. *Eur Radiol* 2001;11:1688-96.
